1 **Double-digest RAD sequencing outperforms microsatellite loci at assigning**  
2 **paternity and estimating relatedness: a proof of concept in a highly promiscuous**  
3 **bird**

4  
5 Derrick J. Thrasher<sup>3,4</sup>, Bronwyn G. Butcher<sup>1</sup>, Leonardo Campagna<sup>1,2</sup>, Michael S.  
6 Webster<sup>3,4</sup>, Irby J. Lovette<sup>1,2</sup>  
7

8  
9 <sup>1</sup>Fuller Evolutionary Biology Program, Cornell Laboratory of Ornithology, Ithaca, NY  
10 14850, USA

11 <sup>2</sup>Department of Ecology and Evolutionary Biology, Cornell University, E145 Corson Hall,  
12 Ithaca, NY 14853, USA

13 <sup>3</sup>Macaulay Library, Cornell Lab of Ornithology, 159 Sapsucker Woods Rd, Ithaca, NY  
14 14850, USA

15 <sup>4</sup>Department of Neurobiology and Behavior, Cornell University, W361 Mudd Hall, 215  
16 Tower Rd, Ithaca, NY 14853, USA  
17

18 **Keywords:** double-digest restriction site-associated DNA sequencing (ddRAD-seq),  
19 microsatellite, single nucleotide polymorphism (SNP), parentage, relatedness,  
20 cooperative breeding  
21

22 \*Corresponding author: Derrick J. Thrasher, Macaulay Library, Cornell Lab of  
23 Ornithology, 159 Sapsucker Woods Rd, Ithaca, NY 14850, USA. Fax: (607) 254-2439.  
24 Email: [djt224@cornell.edu](mailto:djt224@cornell.edu)  
25  
26

27 Running title: ddRAD-seq SNPs outperform microsatellite loci  
28  
29  
30  
31  
32  
33  
34  
35  
36  
37  
38  
39  
40  
41  
42  
43

## 44 **Abstract**

45           Information on genetic relationships among individuals is essential to many  
46 studies of the behavior and ecology of wild organisms. Parentage and relatedness  
47 assays based on large numbers of SNP loci hold substantial advantages over the  
48 microsatellite markers traditionally used for these purposes. We present a double-digest  
49 restriction site-associated DNA sequencing (ddRAD-seq) analysis pipeline that, as such,  
50 simultaneously achieves the SNP discovery and genotyping steps and which is  
51 optimized to return a statistically powerful set of SNP markers (typically 150-600 after  
52 stringent filtering) from large numbers of individuals (up to 240 per run). We explore the  
53 tradeoffs inherent in this approach through a set of experiments in a species with a  
54 complex social system, the variegated fairy-wren (*Malurus lamberti*), and further validate  
55 it in a phylogenetically broad set of other bird species. Through direct comparisons with  
56 a parallel dataset from a robust panel of highly variable microsatellite markers, we show  
57 that this ddRAD-seq approach results in substantially improved power to discriminate  
58 among potential relatives and considerably more precise estimates of relatedness  
59 coefficients. The pipeline is designed to be universally applicable to all bird species (and  
60 with minor modifications to many other taxa), to be cost- and time-efficient, and to be  
61 replicable across independent runs such that genotype data from different study periods  
62 can be combined and analyzed as field samples are accumulated.

63

64

65

## 66 **Introduction**

67           Advances in molecular techniques over the past several decades have  
68 substantially improved our ability to test questions about animal social behavior by  
69 providing reliable information on the genetic relationships among individuals (Westneat  
70 *et al.* 1990; Hughes 1998; Avise *et al.* 2002; Griffith *et al.* 2002; Solomon *et al.* 2004;  
71 Myers & Zamudio 2004). Microsatellites have been the molecular ‘tool-of-choice’ for this  
72 application since the 1990s, as microsatellite loci are often highly polymorphic, with up to  
73 dozens of co-segregating alleles at a single locus (Queller *et al.* 1993; Li *et al.* 2002;  
74 Selkoe & Toonen 2006; Guichoux *et al.* 2011). Accordingly, a small number of highly  
75 variable microsatellite loci can provide considerable power for discerning genetic  
76 relationships among individuals (Queller *et al.* 1993; Blouin 2003; Webster & Reichart  
77 2005). However, microsatellite assays also have some practical drawbacks.  
78 Microsatellite laboratory protocols developed for one species are often not suitable for  
79 use in other species because the primers may not amplify well and targeted loci are  
80 often not as polymorphic, especially in more distantly related taxa (Galbusera 2000;  
81 Decroocq *et al.* 2003; Hedgecock *et al.* 2004; Primmer *et al.* 2005). Next-generation  
82 sequencing has made the discovery of microsatellite loci for individual species more  
83 attainable (Davey *et al.* 2011). However, discovering microsatellite loci can be very time  
84 consuming and costly, largely due to protracted testing and optimization of candidate  
85 primers after the initial sequencing. Additionally, traditional PCR-based microsatellite  
86 assays also incur substantial financial and lab-bench time investments. The manual  
87 scoring of microsatellite alleles also requires substantial researcher time, and can

88 involve various forms of error arising from alleles that have more than one clearly  
89 defined peak, allelic drop-out and null allele issues, and the various sources of human  
90 error that are inherent in any complicated workflow (Pemberton *et al.* 1995; Hedgecock  
91 *et al.* 2004; Hoffman & Amos 2005; Kalinowski *et al.* 2007).

92 Many of these limitations are less severe in assays based on single-nucleotide  
93 polymorphisms (SNPs), which require fewer steps and have greater automation (Gut  
94 2001; Syvänen 2001; Seeb *et al.* 2011; Davey *et al.* 2011). SNPs are appropriate  
95 alternatives for studies of parentage and relatedness data because they are abundant in  
96 the genome, have low mutation rates (Brumfield *et al.* 2003; Morin *et al.* 2004), and can  
97 be scored semi-automatically (Garvin *et al.* 2010; Guichoux *et al.* 2011). In comparison  
98 to microsatellite-based relationship tests, the primary limitation of SNPs is that they are  
99 typically biallelic, whereas microsatellite loci are often multiallelic, and hence the  
100 statistical power of SNP loci for discriminating parentage and relatedness is far lower on  
101 a per-locus basis (Ball *et al.* 2010). Compared to highly variable microsatellite loci, a  
102 substantially higher number of SNP markers is therefore required to achieve appropriate  
103 power in parentage and relatedness studies (Glaubitz *et al.* 2003; Morin *et al.* 2004;  
104 Coates *et al.* 2009).

105 Recently, the application of SNPs for use in analyses of parentage, relatedness,  
106 and overall population structure has received greater attention (Glaubitz *et al.* 2003;  
107 Anderson & Garza 2006; Coates *et al.* 2009). Studies in birds (Cramer *et al.* 2011;  
108 Weinman *et al.* 2015; Kaiser *et al.* 2017), fish (Hauser *et al.* 2011), and several  
109 domesticated taxa (Tokarska *et al.* 2009; Fernández *et al.* 2013) have developed

110 sufficiently large SNP panels to attain a comparable, if not better, level of resolving  
111 power as highly polymorphic microsatellite panels. While each of these studies manage  
112 to identify powerful SNP panels, the SNP genotyping methods used are often labor  
113 intensive, requiring a significant amount of preparatory work at the discovery stage prior  
114 to genotyping of large numbers of individuals. Many of these methods also rely on  
115 reference genomes (Anderson & Garza 2006; Heylar *et al.* 2011), or other genomic  
116 resources (Fernández *et al.* 2013; Weinman *et al.* 2015; Kaiser *et al.* 2017) (e.g.  
117 transcriptome, SNP microarray), for SNP identification. Ultimately, this has afforded  
118 several beneficial examples of the utility of SNPs for parentage and relatedness  
119 analyses, but without an efficient, universal method of SNP discovery and identification.

120         Restriction site-associated DNA sequencing (RAD-seq) is a reduced-  
121 representation genomic technique that is widely used in molecular genetic studies  
122 (Davey & Blaxter 2010; Etter *et al.* 2012; Puritz *et al.* 2014), particularly for linkage and  
123 quantitative trait locus (QTL) mapping (Baird *et al.* 2008), genome wide association  
124 studies (Davey *et al.* 2011), and phylogeography (Andrews *et al.* 2016). RAD-seq uses a  
125 restriction enzyme to fragment and sample a fraction of a genome; as it identifies SNPs  
126 with no prior knowledge of the genome, it provides a more universal method of SNP  
127 discovery (Willing *et al.* 2011). Double-digest restriction site-associated DNA sequencing  
128 (ddRAD-seq) allows for selection of an even smaller fraction of the genome through the  
129 combined use of two restriction enzymes and a subsequent size selection step, affording  
130 the ability to target a smaller total number of SNPs in a greater number of individuals  
131 (Peterson *et al.* 2012; Puritz *et al.* 2014; Kess *et al.* 2016). This ability, in concert with

132 the fact that no prior knowledge of the genome is needed, makes ddRAD-seq an  
133 attractive method of simultaneous SNP discovery and screening for use in discerning  
134 genetic relationships among individuals.

135 Here, we describe a ddRAD-based approach to the simultaneous discovery and  
136 screening of high numbers of SNP loci with high power for testing questions about  
137 parentage and relatedness. These protocols are optimized to generate an appropriately  
138 robust set of SNP markers for 240 individuals per run, to be repeatable across runs to  
139 allow the combination of SNP datasets generated at different times, and to be  
140 universally applicable to birds (and with small modifications, to other organisms) without  
141 requiring a species-specific marker discovery step. We validate these methods by  
142 conducting a SNP-based parentage and relatedness study in the highly promiscuous,  
143 and socially complex, variegated fairy-wren (*Malurus lamberti*). We compare the results  
144 with previously generated paternity assignments and relatedness information, based on  
145 microsatellite screens of the same fairy-wren individuals and social groups. To illustrate  
146 the broad utility of this method we report the number of loci recovered for equivalent  
147 studies of parentage that included different numbers of individuals (from less than 10 to  
148 almost 500) of a variety of other species that collectively span much of the phylogenetic  
149 diversity of living birds.

150

## 151 **Methods & Materials**

152 *Study population*

153           The variegated fairy-wren, endemic to Australia, is a cooperatively breeding bird  
154 that lives in social groups composed of kin and non-kin (Schodde 1982; Rowley &  
155 Russell 1997). Male dispersal is limited, and rates of extra-pair fertilizations (EPFs) are  
156 high (~68% of all young, assessed with a panel of 12 species-specific microsatellites; DJ  
157 Thrasher, unpublished data). We intensively monitored a color-banded population of the  
158 nominate subspecies, *M. l. lamberti*, on Lake Samsonvale (27<sup>o</sup>16' S, 152<sup>o</sup> 41' E), 30 km  
159 northwest of Brisbane, Queensland, Australia, from 2012 – 2016. The population  
160 ranges from about 250-300 adults depending on year-to-year conditions. The study site  
161 is bounded on most sides by Lake Samsonvale, and on its westernmost side by a major  
162 highway, which increases our confidence in sampling most, if not all, of the adults in the  
163 population. We also monitored all nesting attempts to measure, mark, and collect blood  
164 samples from nestlings 6 days after hatching. Blood samples were immediately stored in  
165 lysis buffer (White & Densmore 1992), and genomic DNA was later extracted using  
166 Qiagen DNeasy Blood and Tissue kits. DNA concentration was determined using the  
167 Qubit dsDNA BR Assay Kit and the Qubit® Fluorometer (Life Technologies) following  
168 the manufacturers protocol.

169

#### 170 *Microsatellite development and genotyping*

171           We previously developed twelve polymorphic microsatellite loci for the variegated  
172 fairy-wren (Table S1, Supporting Information) following methods described previously in  
173 Nali *et al.* (2014). Briefly, we extracted genomic DNA from blood in lysis buffer from eight  
174 adults in our study population, enriched the mix of DNA with repetitive sequences to

175 develop an enriched microsatellite library, and conducted an Illumina MiSeq sequencing  
176 run. From this pool of sequences, we optimized twelve loci that amplified well using  
177 polymerase chain reaction (PCR), were polymorphic, and exhibited clearly defined  
178 peaks for genotyping. We designed three multiplexed PCRs for genotyping, and each  
179 amplification reaction contained 1ul of genomic DNA of varying concentrations (1 ng/ul -  
180 40 ng/ul). PCR products were combined with the GeneScan 500 base pair LIZ internal  
181 size standard for size-sorting using a 3730 DNA Analyzer. We used Geneious version  
182 8.0 (Kearse *et al.* 2012) to score alleles. The program automatically identifies alleles at  
183 each locus, and we manually inspected allele calls to minimize genotyping error. In total,  
184 we genotyped 287 adults and 482 nestlings from 226 nests sampled during the 2012-  
185 2016 breeding seasons.

186

### 187 *ddRAD sequencing*

188 We selected a subset of the individuals genotyped for microsatellite loci (120  
189 adults and 40 nestlings) for use in our ddRAD-seq experiment and subsequent  
190 analyses. To assess the reliability of our SNP panel for parentage and relatedness  
191 analysis, we chose representative nestlings from all the years of our study. Typically, we  
192 selected one nestling from any individual nest. In a few cases, we selected two nestlings  
193 that prior microsatellite analysis had assigned to the same mother but different fathers.  
194 For each nestling, we included the mother, the social father, and the genetic father as  
195 assigned by previous microsatellite analysis. Our pool of candidate parents included 24



196 mothers and 78 putative fathers, and 18 randomly selected individuals of both sexes, for  
197 a total of 120 adults.

198 Our ddRAD-seq protocol is adapted from Peterson et al. (2012) (see Supporting  
199 Information for a detailed protocol). Briefly, for each individual, 100ng - 500ng of DNA  
200 (20ul of DNA between concentrations of 5ng/ul - 25ng/ul) were digested with either SbfI  
201 and MspI, or SbfI and EcoRI (NEB), and ligated with one of 20 P1 adapters (each  
202 containing a unique inline barcode) and a P2 adapter (P2-MspI or P2-EcoRI). After  
203 digestion and ligation these samples were pooled in groups of 20 (each with a unique P1  
204 adapter) and purified using 1.5X volumes of homemade MagNA made with Sera-Mag  
205 Magnetic Speed-beads (FisherSci) as described by Rohland & Reich (2012). Fragments  
206 of between 450 bp and 600 bp were selected using BluePippin (Sage Science) by the  
207 Cornell University Biotechnology Resource Center (BRC). Following size selection,  
208 index groups and Illumina sequencing adapters were added by performing 11 PCR  
209 cycles with Phusion DNA Polymerase (NEB). These reactions were cleaned up with 0.7x  
210 volumes of MagNA and pooled in equimolar ratios to create a single library for  
211 sequencing on one lane of Illumina HiSeq 2500 (100 bp single end, performed by BRC).  
212 The sequencing was performed with a ~10% PhiX spike-in to introduce diversity to the  
213 library.

214 By replicating 20 samples (run as a separate index group) with a wider  
215 BluePippin size selection range of 400-700 bp, we explored the inherent trade-off  
216 between the number of samples sequenced on a lane at a given coverage threshold and  
217 the number of SNPs recovered per sample. We similarly explored the effects of using a

218 less frequent restriction enzyme digest (by substituting the 6 bp cutter EcoRI in place of  
219 the 4 bp cutter MspI) to generate a smaller total number of fragments in our size range,  
220 which in turn should increase the sequencing coverage of the loci screened.

221 To assess repeatability across index groups, we replicated two index groups,  
222 each comprised of 20 samples: one index group from the standard protocol, and the  
223 index group generated with the rare-cutter EcoRI enzyme (Table 1). We multiplexed the  
224 resulting 240 samples in 12 index groups (with 20 individuals each) which were pooled  
225 into a final library that was sequenced on one lane of an Illumina HiSeq 2500, producing  
226 220,300,739 100 bp single end reads. Eight index groups included the samples used for  
227 assigning paternity and estimating relatedness, and four additional index groups were  
228 included to assess the variation in the number of loci recovered with changes in our  
229 molecular protocol (choice of enzyme and size selection window), and to assess  
230 repeatability (see Table 1). To avoid an additional source of variation these last four  
231 index groups each included the same 20 individuals.

232

### 233 *SNP data analysis*

234

#### 235 Quality filtering and demultiplexing

236 After the quality of the reads was assessed using FASTQC version 0.11.5  
237 ([www.bioinformatics.babraham.ac.uk/projects/fastqc](http://www.bioinformatics.babraham.ac.uk/projects/fastqc)), we trimmed all sequences to 97bp  
238 using fastX\_trimmer (FASTX-Toolkit) to exclude low quality calls near the 3' of the reads.  
239 We subsequently removed reads containing at least a single base with a Phred quality

240 score of less than 10 (using `fastq_quality_filter`). We additionally removed sequences if  
241 more than 5% of the bases had a Phred quality score of less than 20. Using  
242 `process_radtags` module from the Stacks version 1.37 pipeline (Catchen *et al.* 2013), we  
243 demultiplexed the reads to obtain files with sequences that were specific to each  
244 individual.

245

#### 246 De novo assembly of RAD loci

247       Because we do not have a sequenced genome for the variegated fairy wren or a  
248 close relative – which is likely to be the case for many non-model organisms involved in  
249 parentage studies – we assembled the sequences de novo using the Stacks pipeline  
250 (Catchen *et al.* 2013). If the genome of the species of interest (or a closely related  
251 species) is available, a reference based assembly of RAD loci is preferred (Shafer *et al.*  
252 2017). First, we used `denovo_map.pl` to assemble the reads into a catalog allowing a  
253 minimum stack depth of 5 (`m` parameter), up to 5 mismatches per locus within an  
254 individual (`M` parameter), and 5 mismatches between loci of different individuals when  
255 building the catalog (`n` parameter). This combination of parameters has been shown to  
256 work well for other similarly polymorphic passerine birds (Campagna *et al.* 2015), but we  
257 expect the optimal set of parameters to vary across datasets. For a detailed exploration  
258 on how the different assembly parameters in stacks impact the number and quality of  
259 loci recovered, see Paris *et al.* (2017). We ran the `rxstacks` module to filter loci with a log  
260 likelihood of less than -50 (`lnl_lim -50`) or that were confounded in at least 25% of the

261 population (conf\_lim 0.25). We then built a new catalog by rerunning cstacks and  
262 obtained individual genotype calls with sstacks.

263

#### 264 SNP filtering

265 SNPs were exported using the populations module of the Stacks pipeline. All of  
266 our samples were grouped in one population and a locus was exported if it was present  
267 in 95% of the individuals in this population (r parameter) at a stack depth of at least 10  
268 (m parameter). When a RAD locus had more than one SNP, the data were restricted to  
269 the first one (--write\_single\_snp) to avoid including SNPs in high linkage disequilibrium  
270 (LD). We required a minor allele frequency of at least 0.25 to process a nucleotide site (-  
271 -min\_maf).

272 Using vcftools version 0.1.14 (Danecek *et al.* 2011), we removed loci that were  
273 not in Hardy-Weinberg equilibrium (---hwe). We also confirmed that LD was low by  
274 calculating r<sup>2</sup> values for every pairwise combination of SNPs in the final dataset using  
275 vcftools (data not shown). We obtained a variant call format (vcf) file that was converted  
276 to genepop format in PGD Spider version 2.0.5.0 (Lischer & Excoffier 2012) and  
277 imported into CERVUS version 3.0.7 (Kalinowski *et al.* 2007).

278

#### 279 Assessing repeatability and overlap in different sets of RAD loci

280 We conducted five independent de novo assemblies using stacks, one for our  
281 larger set of 160 samples, and one for each of the four index groups included in the  
282 sequencing run to assess repeatability and understand the impact of variations in the

283 protocol on the number of loci recovered (Table 1). Once the assemblies were  
284 completed, we filtered and exported loci independently as described above. We then  
285 queried what the overlap among these sets of loci was (e.g., between the full set of 160  
286 samples and a replicate of 20 samples – index 9). To better understand sources of  
287 variation in our experimental protocol we also asked if the loci retained after filtering  
288 were present in the catalogs of different assemblies. To assess overlap in sets of RAD  
289 loci we first generated FASTA files with the sequence data from both the filtered loci  
290 from each assembly and from the entire catalog. We then used blast version 2.3.0  
291 (Altschul *et al.* 1990) with an E-value of 1e-10 to find matches among these FASTA files  
292 and calculate the proportion of RAD tags shared by the different sets of sequences  
293 (Tables 2 and 3).

294

### 295 *Parentage analysis*

296 We used CERVUS version 3.0.7 (Kalinowski *et al.* 2007) to assign paternity for all  
297 nestlings using our microsatellite and SNP datasets separately. CERVUS uses a two-  
298 step, likelihood-based approach to assign parentage. First, CERVUS compares each  
299 offspring's genotype to that of a candidate parent and a random individual in the  
300 population to calculate a likelihood ratio. This relationship is presented as an LOD score,  
301 which is simply the natural logarithm of the calculated likelihood ratio. Positive LOD  
302 scores indicate that a candidate parent is much more likely to be the true parent,  
303 whereas negative LOD scores indicate that the candidate parent is highly unlikely to be  
304 a true parent. Second, CERVUS conducts a simulation of parentage analysis based on

305 population allele frequencies and the proportion of potential parents included in the  
306 analysis. The simulation accounts for the possibility of unsampled parents, missing data,  
307 and genotyping errors. Considering these parameters, the simulation calculates critical  
308 LOD scores by comparing the LOD distributions of the most likely parent and all other  
309 candidate parents. The critical LOD score is used to determine the confidence (95% or  
310 80%) of each parentage assignment.

311 CERVUS allows for different types of parentage analysis, including parent-pair  
312 (sexes known or unknown), maternity (known father, but not mother), and paternity  
313 (known mother, but not father). Variegated fairy-wrens at Lake Samsonvale are relatively  
314 easy to observe, and we were able to assign known mothers behaviorally. We  
315 subsequently confirmed this with microsatellite analyses: females that built and attended  
316 a nest throughout incubation were always the mothers of the nestlings in that nest. In  
317 many systems, a comparable level of demographic knowledge may not be available, so  
318 a marker set must be powerful enough to assign parentage with minimal social  
319 information. To investigate the broader utility of our ddRAD-seq method, we conducted  
320 analyses that relied on the inclusion of the known mother, in addition to analyses  
321 independent of the known mother, which were based only on the father-offspring  
322 relationship. We simulated paternity assignments for 10,000 offspring to determine  
323 critical LOD scores, using slightly different input parameters for each panel  
324 (microsatellites and ddRAD sequencing derived SNPs). Simulations for both used the  
325 following parameters: 78 candidate males, 95% of candidate males sampled, estimated  
326 error rate of 0.01 for mistyped loci and likelihood scores. The proportion of loci typed

327 across all individuals was different for both panels: 0.997 for the microsatellite  
328 simulation, and 0.961 for the SNP simulation.

329 For both paternity analyses, we used the trio LOD score and the father-offspring  
330 LOD score from CERVUS to make assignments. The trio LOD score was calculated by  
331 comparing the genotypes of the candidate male and offspring, relative to that of the  
332 known mother. The father-offspring LOD score only accounts for the relationship of the  
333 candidate male and the offspring, independent of the known mother. CERVUS ranked  
334 candidate males by LOD scores in each category, and the highest-ranking males were  
335 assigned as fathers. These rankings should be in agreement, but ambiguous  
336 assignments (different top-ranking males assigned in each category) may occur when  
337 multiple candidate male genotypes closely match an offspring's genotype.

338 We assessed each CERVUS assignment to determine whether it was plausible,  
339 and whether the assigned male was the social father or an extra-pair sire. Our criteria for  
340 accepting assignments differed slightly for microsatellites and SNPs. For microsatellites,  
341 we automatically accepted the CERVUS assignment if the highest-ranking male was in  
342 agreement for both the trio LOD and the father-offspring LOD, and if the number of  
343 mismatches between the assigned male and the offspring was  $\leq 1$  (8% of 12 loci). For  
344 SNPs, we also accepted the assignment if the highest-ranking males by LOD score type  
345 were in agreement, and an allowable number of mismatches were not exceeded.  
346 However, for SNPs, our allowable number of mismatches was based on the observed  
347 maximum number of mismatches between a known mother and her known offspring  
348 (max. = 7, mean = 3.4, 2% of 411 loci). For both panels, we accepted the social father

349 as the genetic sire if he met these respective criteria. If the social father mismatched the  
350 offspring at higher numbers, or had negative LOD scores, the offspring was considered  
351 sired by an extra-pair father. We accepted assignments of extra-pair fathers using the  
352 same criteria outlined above. We did not observe cases in which an offspring could not  
353 be assigned to either its social father, or an extra-pair sire.

354

### 355 *Relatedness analysis*

356 We used the package, 'related' (Pew *et al.* 2015), in R version 3.2.5 (R Core  
357 Team 2016) to estimate pairwise relatedness ( $r$ ) between all pairs of individuals in this  
358 study. This package accounts for genotyping errors, missing data, and can estimate  
359 relatedness using any of seven different estimators (4 non-likelihood-based, and 3  
360 likelihood-based). 'Related' includes the function, **compareestimators**, which tests the  
361 performance of different estimators on simulated data that share the same  
362 characteristics as the real data. The program uses an allele frequency file to generate  
363 simulated pairs of individuals of known relatedness, and automatically estimates  
364 relatedness using four of the most commonly used estimators (all non-likelihood-based).  
365 The function calculates a correlation coefficient between observed and expected values,  
366 to evaluate which estimator performs best with the data set. Using **compareestimators**  
367 to generate 200 simulated pairs of individuals for each degree of relatedness (i.e., half-  
368 sib, full-sib, parent-offspring, unrelated), we determined that the Wang (2002) estimator  
369 performed best for both our microsatellite and SNP datasets. We obtained point



370 estimates of relatedness using the Wang (2002) estimator, and evaluated all parent-  
371 offspring relationships that were previously determined in our parentage analysis.

372 'Related' also evaluates how well different marker sets resolve degrees of  
373 relatedness, given simulated genotypes based on allele frequency files. For both panels,  
374 we used the **familysim** function to generate 200 pairs of individuals for each degree of  
375 relatedness. We then used the **coancestry** function to analyze all pairwise relatedness  
376 values with the Wang (2002) estimator. We created density plots representing  
377 histograms of the relatedness values. These plots show the overlap in relatedness  
378 values for degree of relatedness, and we used them to infer how well each panel  
379 performed at discerning different relationships.

380

### 381 *Comparison with other avian ddRAD datasets*

382 We applied the same molecular protocol and bioinformatics pipeline described  
383 above to other avian species, with the objective of assigning paternity and estimating  
384 relatedness. These datasets ranged between 6 and 480 samples, and we calculated the  
385 number of loci recovered for comparisons with the current data and to assess the utility  
386 of our method with larger sample sizes. We also genotyped an additional 213 variegated  
387 fairy-wren individuals and re-analyzed the data in combination with the 160 samples  
388 included in this study.

389

## 390 **Results**

### 391 *SNP development and analysis*

392           After trimming, filtering and demultiplexing the data, we retained a total of  
393 109,524,874 reads across all index groups, with an average of approximately 9,000,000  
394 reads per index group. Two individuals failed (i.e., had less than 66,000 reads each; one  
395 individual from each of two index groups) and were excluded from further analysis. The  
396 number of reads per sample for the remaining individuals ranged from 213,544 to  
397 810,966 (mean = 459,726  $\pm$  118,771 std. dev.).

398           Further analysis using the population program from stacks identified loci with at  
399 least 10X coverage, present in 95% of the individuals, and a minimum allele frequency  
400 greater than 25%. We further retained only those loci that were in Hardy-Weinberg  
401 equilibrium. When performing analyses on all 160 individuals from the primary  
402 comparison runs (Table 1), we identified 411 loci that fulfilled these criteria and were  
403 used for downstream analyses.

404           We varied two aspects of the ddRAD-seq protocol to assess the number of loci  
405 recovered and the reproducibility of the method. As expected, both a reduction in the  
406 range of fragment sizes selected during the construction of the library (compare groups  
407 A (150 bp size selection) and C (300 bp size selection)), or the use of the less frequent  
408 cutter, EcoRI (groups D and E), resulted in fewer loci recovered (Table 2). Those from  
409 the EcoRI digest were mostly non-overlapping with those from the MspI index groups.  
410 More importantly, between the replicated index groups in our standard protocol (A and  
411 B) we recovered similar numbers of loci (797 and 645, respectively) with 549 (85.1%)  
412 loci found in both datasets under our stringent filtering criteria. Moreover, when we  
413 searched for the loci recovered in A in the catalog of B, and vice versa, the overlap was

414 above 99% (Table 3). This suggests that very similar sets of loci were recovered in these  
415 independent assemblies, and that there was variation in the loci that passed our filtering  
416 criteria. Although changing our filtering parameters led to a slight increase in the  
417 proportion of overlap in the loci recovered between A and B, the total number of  
418 overlapping loci increased substantially. When we accepted 20% missing data instead of  
419 5%, the proportion of overlap was 86%, with 857 loci in total. When we changed the  
420 minor allele frequency filter from 0.25 to 0.05 we obtained 88% overlap and a total of  
421 1227 loci (Table S2, Supporting Information).

422

#### 423 *Paternity assignments*

424 Both panels produced highly concordant results when assigning paternity, but the  
425 SNP panel showed substantially higher power overall. Generally, the microsatellite loci  
426 were more polymorphic, resulting in greater mean polymorphic information content (PIC)  
427 for any given locus. Despite this, the SNP panel performed better because of the large  
428 number of loci obtained through RAD sequencing. This greatly improved the non-  
429 exclusion probabilities across different parentage assignment contexts (Table 4), and  
430 reduced uncertainty in our assignments. Given the known mother, the microsatellite and  
431 SNP panels assigned the same fathers to all 40 offspring with 95% confidence. When  
432 paternity assignments were made without the known mother (no known candidate  
433 parents), both panels again assigned fathers for all 40 offspring with 95% confidence.  
434 However, 5 of these assignments were not in agreement between the two panels. For  
435 these 5 cases, two candidate males had very similar LOD scores under the

436 microsatellite panel, and the assigned males did not match the males that were  
437 assigned given the known mother. These (and all other) cases were resolved  
438 unambiguously when the SNP panel was used, and the paternity assignments with and  
439 without the known mother were in complete agreement for all offspring (Fig. 1).

440 Overall, both panels assigned 23 out of 40 nestlings (57.5%) to males that were  
441 not their social father. Due to the nature of our non-random sampling of individuals for  
442 this experiment, and the overall smaller sample size, this value is slightly lower than the  
443 overall rate of 67.6% extra-pair young observed for all years of the study (unpublished  
444 data).

445 As a measure of certainty for our assignments, we calculated the difference  
446 between LOD scores for the two top-ranked males assigned to each nestling, under  
447 each panel (Fig. 2). Typically, this difference was 8 – 10x higher for the SNP panel  
448 (n=40, mean = 165.0) than for the microsatellite panel (n=40, mean 19.1), a reflection of  
449 the much higher discriminatory power of the SNP dataset. For the SNP panel, many of  
450 the second-ranked males had a strongly negative LOD score, making them extremely  
451 unlikely to be the true father. This was less often true for the microsatellite panel, as the  
452 second-ranked males often had positive, or just slightly negative, LOD scores. Overall  
453 this result illustrates the increased discrimination power achieved by the SNP panel  
454 compared to the microsatellites, which allowed us to assign paternity in cases in which  
455 the microsatellite assignments remained ambiguous or (albeit rarely) misleading.

456

457 *Relatedness analysis*

458           The SNP panel produced simulated data that closely matched the observed allele  
459 and genotype frequencies (Pearson's correlation coefficient = 0.975). The microsatellite  
460 panel also matched well, but was not as reliable as the SNP panel (Pearson's  
461 correlation coefficient = 0.877). This resulted in better estimates of pairwise relatedness  
462 for parent-offspring using the SNP panel (Fig. 3). Overall, the SNP panel produced  
463 better simulated estimates for each degree of relatedness (Fig. 4), greatly reducing the  
464 variance around expected relatedness values (unrelated = 0, half-sib = 0.25, full-sib =  
465 0.5, and parent-offspring = 0.5). This bolsters the confidence with which actual  
466 relationships can be discerned when calculating pairwise relatedness of a population for  
467 which there is little prior knowledge of social relationships.

468

## 469 **Discussion**

470           Several recent studies have rigorously investigated the use of SNPs in population  
471 genetic studies for several non-model organisms (Morin *et al.* 2004; Slate *et al.* 2010;  
472 Garvin *et al.* 2010; Heylar *et al.* 2011; Seeb *et al.* 2011), with growing support for the use  
473 of SNPs in studies of parentage (Anderson & Garza 2006; e.g. Hauser *et al.* 2011; e.g.  
474 Kaiser *et al.* 2017; e.g. Kess *et al.* 2016) and relatedness (e.g. Glaubitz *et al.* 2003;  
475 Wang 2007). SNPs have proven to perform as well, if not better than microsatellites in  
476 these types of studies. To our knowledge this is the first study to describe a universal  
477 ddRAD-seq method for use in parentage and relatedness analyses of wild populations.  
478 Our study is also the first to compare the efficiency of microsatellites versus SNPs for  
479 determining genetic relationships in a bird species that is both socially complex and

480 highly promiscuous. We show that SNPs developed from our modified ddRAD-seq  
481 method are substantially more powerful than a moderate number of species-specific  
482 microsatellite loci at assigning paternity and estimating relatedness among individuals.  
483 Our method is highly attractive as an alternative to traditional microsatellite genotyping,  
484 especially for systems where no microsatellites have been developed. This is largely  
485 due to the combination of its cost and researcher time efficiency, the ease of this non-  
486 species-specific method that combines the SNP discovery and screening steps, and the  
487 large number of SNPs reliably recovered.

488         The total approximate materials cost for our ddRAD-seq analyses, including DNA  
489 extraction, normalization of the DNA concentrations, library preparation, sequencing and  
490 computational time was US \$3,270.00 for 240 samples, or approximately \$13.6 per  
491 sample. The initial investment in oligonucleotides (i.e., primers and adaptors; see the  
492 Supplementary ddRAD-seq Protocol in the Supporting Information) was US \$2000 and  
493 is sufficient for the analysis of thousands of samples, making the per sample cost  
494 negligible. The use of a homemade MagNA in place of commercial SPRI beads provides  
495 significant savings. This cost is similar to that for genotyping 240 individuals at 12  
496 microsatellite loci (in 3 multiplexed PCR mixes), in a situation where the labelled primers  
497 have already been designed, purchased, and tested. However, a substantial additional  
498 benefit of this ddRAD-seq method is that it does not require any locus discovery or  
499 development before starting. The time required for library preparation, once DNA has  
500 been extracted, is modest, and once the sequence data have been obtained, SNP  
501 calling for the entire dataset can be performed in less than a day through a largely

502 automated bioinformatics pipeline (see Supporting Information). Unlike manually scoring  
503 peaks in traditional microsatellite genotyping analyses, the identification of SNPs is less  
504 subjective and takes far fewer hours of hands-on analysis (as most is performed  
505 computationally). The tools for analyzing these ddRAD data are freely available and  
506 widely used (e.g., Stacks, VCFtools). Nevertheless, we note that assembling RAD loci  
507 can still be challenging, and the choice of bioinformatics pipelines and specific  
508 combinations of assembly parameters can influence the quality and quantity of loci  
509 recovered (for detailed discussions on these issues see Eaton 2014, Mastretta-Yanes *et*  
510 *al.* 2015, Shafer *et al.* 2017 and Paris *et al.* 2017).

511 For this study, our conditions and protocol allowed us to recover 411 high quality  
512 SNP loci for 160 individual samples (although 240 samples were multiplexed together on  
513 one lane of sequencing). However, we show that through simple variations in the size  
514 selection window or the specificity of the restriction enzyme, more or fewer loci can be  
515 obtained. For some applications, it could be advantageous to multiplex a greater number  
516 of individuals and achieve similar coverage by aiming to recover fewer loci (e.g., using  
517 EcoRI rather than MspI). Alternatively, for applications where more loci are required, the  
518 size selection window could be widened and concordantly the number of individuals  
519 would have to be lowered. It is also possible to vary the number of loci retained by  
520 applying different bioinformatics filters. With strict filtering parameters (5% missing data,  
521 minor allele frequency of 0.25 and minimum depth of coverage of 10x) we recovered  
522 411 loci, which contained sufficient information to accurately assign paternity and  
523 estimate relatedness among the individuals in our study. However, with only slight

524 modification of these parameters it is possible to greatly increase the number of loci  
525 recovered. A total of 506 loci were retained when we allowed a minimum coverage of 5x,  
526 742 with up to 20% missing data, and 910 with a minor allele frequency of 0.05 (we  
527 varied one filter at a time).

528         The number of SNPs needed to perform robust parentage and relatedness  
529 analyses depends on characteristics of the study population. Populations with reduced  
530 genetic diversity will likely require a greater number of loci than those that are more  
531 genetically diverse (Saunders *et al.* 2007; Strucken *et al.* 2016; Tortereau *et al.* 2017).  
532 Obtaining more loci from the outset would aid in overcoming any issues relating to  
533 population genetic diversity. Additionally, when studying species with complex social  
534 systems, including for example both variable levels of genetic relatedness among  
535 individuals and high rates of extra-pair fertilizations, it is imperative to obtain a sufficient  
536 number of markers to discern genetic relationships robustly (Hughes 1998; Ross 2001;  
537 Weinman *et al.* 2015). Our case study, using the variegated fairy-wren, shows that our  
538 modified ddRAD-seq method recovers more than enough SNP loci to confidently discern  
539 relationships in a species with a complex social system. Most parentage and  
540 relatedness analysis programs are well equipped to handle large numbers of loci, so a  
541 greater number of loci would not hinder analyses. Once an appropriate number of SNPs  
542 are identified for performing robust analyses, conditions can be varied to maximize the  
543 number of individuals to be genotyped. For our purposes, we conducted parentage and  
544 relatedness analyses in CERVUS and the R package 'related,' respectively, to reliably  
545 compare the performance of our microsatellite and SNP panels. Several other pedigree



546 reconstruction programs are readily available (e.g. COLONY, MasterBayes, and  
547 Sequoia) and researchers can easily input SNP data into their preferred program (for  
548 detailed comparisons of some of these programs see Karaket *et al.* 2012 and Weinman  
549 *et al.* 2015). The R package, ‘Sequoia’ (Huisman 2017), is specifically tailored for SNP  
550 data, and can reconstruct multi-generational pedigrees with as few as 100 SNPs and  
551 many non-genotyped individuals. Given these considerations, ‘Sequoia’ may be  
552 particularly useful for studies with limited social information or incomplete population  
553 sampling.

554         For both paternity and relatedness analyses, our SNP panel far outperformed our  
555 microsatellite panel by providing much more power and improving the overall confidence  
556 for assignments. Variegated fairy-wrens are relatively easy to observe, and every nest  
557 found can be assigned to a known mother by watching the female that builds the nest  
558 and/or incubates the eggs. This level of knowledge may not be the norm for most study  
559 systems, so we also investigated the CERVUS output for male-offspring relationships,  
560 independent of known mothers. In doing so, the reliability of the SNP panel became  
561 even more evident. In CERVUS, the higher the LOD score, the more likely that a given  
562 male is the true father. Using SNPs, CERVUS typically output only a single male with a  
563 positive LOD score, and the difference in LOD scores between the top-two ranked males  
564 was dramatically different for SNP assignments (Fig. 2). When social information about  
565 the known mother was excluded from the paternity analysis, the microsatellite panel  
566 sometimes produced assignments that were ambiguous (two males had similar LOD  
567 scores), and occasionally the wrong male was assigned paternity of the offspring. Under

568 the SNP panel, ambiguous assignments were nonexistent, and these cases were clearly  
569 resolved (Fig. 1).

570 It is sometimes difficult to obtain appropriate demographic data to use in a formal  
571 parentage analysis, and for many studies, this level of detail may not be necessary.  
572 Population allele frequencies can be used to estimate pairwise relatedness for  
573 individuals, and to reconstruct pedigrees using maximum likelihood-based methods.  
574 Variance in estimates of pairwise relatedness ( $r$ ) for known parent-offspring pairs was  
575 dramatically reduced when using SNPs (Fig. 3). For our simulations, SNPs greatly  
576 improved the differentiation between distributions for individuals of known degrees of  
577 relatedness (Fig. 4). This is particularly important for systems with minimal demographic  
578 and observational data, where these distributions can be used to determine familial  
579 relationships between individuals, in conjunction with actual estimated  $r$ -values.

580 This protocol was designed to be universally applicable across bird species, and  
581 we have successfully applied it in a range of other avian study systems (Table 5). While  
582 different numbers of individuals were used in each study, and therefore different  
583 numbers of loci were recovered, in all cases paternity was confidently assigned to  
584 nestlings using CERVUS (unpublished results). We note that when the number of  
585 individuals genotyped was larger (we have so far tested up to 480 individuals), the  
586 number of loci recovered after filtering was smaller (as low as 135 SNPs with stringent  
587 filtering parameters). Our controls designed to assess repeatability (e.g., compare group  
588 A and B or D and E in Tables 2 and 3) suggest that there is a high degree of overlap  
589 among replicates, but also variation in which loci pass our filters. In cases in which a

590 larger number of loci are needed to accurately assess paternity or estimate relatedness,  
591 some of the filtering parameters may be relaxed. For example, for a set of 373  
592 Variegated fairy-wren individuals (Table 5) the number of loci retained increased from  
593 157 to 410 when 20% missing data was allowed instead of 5%. Accordingly, our protocol  
594 is suitable for long-term studies in which samples are accumulated across several years,  
595 especially if not all individuals need to be compared simultaneously (e.g. non-  
596 overlapping generations or individuals from different years). It is also likely that this  
597 protocol can be applied successfully for studies (short or long-term) where thousands of  
598 individuals need to be compared at one time. This remains to be shown, though, and in  
599 such cases it may be more appropriate to use techniques based on microarrays (see  
600 Fernández *et al.* 2013, Liu *et al.* 2016, and Tortereau *et al.* 2017).

601         Applying this general protocol to many non-avian taxa will simply require ensuring  
602 that specific restriction enzymes and fragment size windows are chosen appropriately.  
603 The size of the genome and the number of individuals multiplexed will have to be taken  
604 into consideration to achieve the desired coverage.

605         In summary, our ddRAD-seq method provides a cost effective and robust way to  
606 identify SNPs for use in studies utilizing parentage and relatedness analyses. Our  
607 experiment shows that a majority of the same SNPs can be obtained across groups,  
608 using the same size selection windows and restriction enzymes. Future individuals can  
609 be genotyped and incorporated to the analysis by re-running the Stacks pipeline. Using  
610 a bird exhibiting great social complexity, and high promiscuity, we have shown that

611 SNPs identified by ddRAD-seq are more effective at assigning paternity and estimating  
612 relatedness than highly polymorphic, species-specific microsatellite loci.

613

## 614 **Acknowledgements**

615 We thank D. Baldassarre, K. Gielow, J. Welklin, and field technicians at Lake  
616 Samsonvale who assisted with field efforts for this study. We are grateful to L. Stenzler  
617 and S. Bogdanowicz for help with microsatellite discovery, development, and  
618 genotyping. D. Baldassarre, E. Greig, & A. Dalziel provided valuable discussion on the  
619 study design. We thank J. LaPergola, J. Welklin, B. Van Doren, and M. Kinnaird for  
620 providing the unpublished data shown in Table 5. We are grateful to Y. Bourgeois and  
621 one anonymous reviewer for valuable comments on a previous version of this  
622 manuscript. This research was supported by the US National Science Foundation (IOS-  
623 1353681 and DEB-1721662).

624

625

626

627

628

629

630

631

632

633 **References**

- 634
- 635 Altschul SF, Gish W, Miller W, Myers EW, Lipman DJ (1990) Basic local alignment  
636 search tool. *Journal of Molecular Biology*, **215**, 403-410.
- 637 Anderson EC, Garza JC (2006) The power of single-nucleotide polymorphisms for large-  
638 scale parentage inference. *Genetics*, **172**, 2567–2582.
- 639 Andrews KR, Good JM, Miller MR, Luikart G, Hohenlohe PA (2016) Harnessing the  
640 power of RADseq for ecological and evolutionary genomics. *Nature Reviews*  
641 *Genetics*, **17**, 81–92.
- 642 Avise JC, Jones AG, Walker D, Dewoody JA (2002) Genetic mating systems and  
643 reproductive natural histories of fishes: lessons for ecology and evolution. *Annual*  
644 *Review of Genetics*, **36**, 19–45.
- 645 Baird NA, Etter PD, Atwood TS *et al.* (2008) Rapid SNP discovery and genetic mapping  
646 using sequenced RAD markers. *PLoS ONE*, **3**, e3376.
- 647 Ball AD, Stapley J, Dawson DA *et al.* (2010) A comparison of SNPs and microsatellites  
648 as linkage mapping markers: lessons from the zebra finch (*Taeniopygia guttata* ).  
649 *BMC Genomics*, **11**, 218.
- 650 Blouin MS (2003) DNA-based methods for pedigree reconstruction and kinship analysis  
651 in natural populations. *Trends in Ecology & Evolution*, **18**, 503–511.
- 652 Brumfield RT, Beerli P, Nickerson DA, Edwards SV (2003) The utility of single nucleotide  
653 polymorphisms in inferences of population history. *Trends in Ecology & Evolution*,  
654 **18**, 249–256.
- 655 Campagna L, Gronau I, Silveira LF, Siepel A, Lovette IJ (2015) Distinguishing noise  
656 from signal in patterns of genomic divergence in a highly polymorphic avian  
657 radiation. *Molecular Ecology*, **24**, 4238-4251.
- 658 Catchen J, Hohenlohe PA, Bassham S, Amores A, Cresko WA (2013) Stacks: an  
659 analysis tool set for population genomics. *Molecular Ecology*, **22**, 3124–3140.
- 660 Coates BS, Sumerford DV, Miller NJ *et al.* (2009) Comparative Performance of Single  
661 Nucleotide Polymorphism and Microsatellite Markers for Population Genetic  
662 Analysis. *Journal of Heredity*, **100**, 556–564.
- 663 Cramer ERA, Hall ML, De Kort SR, Lovette IJ, Vehrencamp SL (2011) Infrequent Extra-  
664 Pair Paternity in the Banded Wren, a Synchronously Breeding Tropical Passerine.  
665 *The Condor*, **113**, 637–645.
- 666 Danecek P, Auton A, Abecasis G *et al.* (2011) The variant call format and VCFtools.  
667 *Bioinformatics*, **27**, 2156–2158.
- 668 Davey JW, Blaxter ML (2010) RADSeq: next-generation population genetics. *Briefings in*  
669 *Functional Genomics*, **9**, 416–423.
- 670 Davey JW, Hohenlohe PA, Etter PD *et al.* (2011) Genome-wide genetic marker  
671 discovery and genotyping using next-generation sequencing. *Nature Reviews*  
672 *Genetics*, **12**, 499–510.
- 673 Decroocq V, Fave MG, Hagen L, Bordenave L, Decroocq S (2003) Development and  
674 transferability of apricot and grape EST microsatellite markers across taxa.  
675 *Theoretical and Applied Genetics*, **106**, 912–922.

- 676 Eaton DA (2014) PyRAD: assembly of de novo RADseq loci for phylogenetic analyses.  
677 *Bioinformatics*, **30**, 1844-1849.
- 678 Etter PD, Bassham S, Hohenlohe PA, Johnson EA, Cresko WA (2012) SNP discovery  
679 and genotyping for evolutionary genetics using RAD sequencing. In: *Molecular*  
680 *Methods for Evolutionary Genetics*. Methods in Molecular Biology. pp. 157–178.  
681 Humana Press, Totowa, NJ.
- 682 Fernández ME, Goszczynski DE, Lirón JP *et al.* (2013) Comparison of the effectiveness  
683 of microsatellites and SNP panels for genetic identification, traceability and  
684 assessment of parentage in an inbred Angus herd. *Genetics and Molecular Biology*,  
685 **36**, 185–191.
- 686 Galbusera P (2000) Cross-species amplification of microsatellite primers in passerine  
687 birds. *Conservation Genetics*, **1**, 163–168.
- 688 Garvin MR, Saitoh K, Gharrett AJ (2010) Application of single nucleotide polymorphisms  
689 to non-model species: a technical review. *Molecular Ecology Resources*, **10**, 915–  
690 934.
- 691 Glaubitz JC, Rhodes OE, Dewoody JA (2003) Prospects for inferring pairwise  
692 relationships with single nucleotide polymorphisms. *Molecular Ecology*, **12**, 1039–  
693 1047.
- 694 Griffith SC, Owens IPF, Thuman KA (2002) Extra pair paternity in birds: a review of  
695 interspecific variation and adaptive function. *Molecular Ecology*, **11**, 2195–2212.
- 696 Guichoux E, Lagache L, Wagner S *et al.* (2011) Current trends in microsatellite  
697 genotyping. *Molecular Ecology Resources*, **11**, 591–611.
- 698 Gut IG (2001) Automation in genotyping of single nucleotide polymorphisms. *Human*  
699 *Mutation*, **17**, 475–492.
- 700 Hadfield JD, Richardson DS, Burke T (2006) Towards unbiased parentage assignment:  
701 combining genetic, behavioural and spatial data in a Bayesian framework. *Molecular*  
702 *Ecology*, **15**, 3715–3730.
- 703 Hauser L, Baird M, Hilborn R, Seeb LW, Seeb JE (2011) An empirical comparison of  
704 SNPs and microsatellites for parentage and kinship assignment in a wild sockeye  
705 salmon (*Oncorhynchus nerka*) population. *Molecular Ecology Resources*, **11**, 150–  
706 161.
- 707 Hedgecock D, Li G, Hubert S, Bucklin K (2004) Widespread null alleles and poor cross-  
708 species amplification of microsatellite DNA loci cloned from the Pacific oyster,  
709 *Crassostrea gigas*. *Journal of Shellfish Research*, **23**, 379–385.
- 710 Heylar SJ, Hemmer Hansen J, Bekkevold D *et al.* (2011) Application of SNPs for  
711 population genetics of nonmodel organisms: new opportunities and challenges.  
712 *Molecular Ecology Resources*, **11**, 123–136.
- 713 Hoffman JI, Amos W (2005) Microsatellite genotyping errors: detection approaches,  
714 common sources and consequences for paternal exclusion. *Molecular Ecology*, **14**,  
715 599–612.
- 716 Hughes C (1998) Integrating molecular techniques with field methods in studies of social  
717 behavior: a revolution results. *Ecology*, **79**, 383–399.
- 718 Huisman, J (2017) Pedigree reconstruction from SNP data: parentage assignment,

- 719 sibship clustering and beyond. *Molecular Ecology Resources*, **17**, 1009-1024.  
720 Kaiser SA, Taylor SA, Chen N *et al.* (2017) A comparative assessment of SNP and  
721 microsatellite markers for assigning parentage in a socially monogamous bird.  
722 *Molecular Ecology Resources*, **17**, 183–193.  
723 Karaket T, Poompuang S (2012) CERVUS vs. COLONY for successful parentage and  
724 sibship determinations in freshwater prawn *Macrobrachium rosenbergii* de Man.  
725 *Aquaculture*, **324**, 307-311.  
726 Kalinowski ST, Taper ML, Marshall TC (2007) Revising how the computer program  
727 CERVUS accommodates genotyping error increases success in paternity  
728 assignment. *Molecular Ecology*, **16**, 1099–1106.  
729 Kearse M, Moir R, Wilson A *et al.* (2012) Geneious Basic: An integrated and extendable  
730 desktop software platform for the organization and analysis of sequence data.  
731 *Bioinformatics*, **28**, 1647–1649.  
732 Kess T, Gross J, Harper, F, Boulding EG (2016) Low-cost ddRAD method of SNP  
733 discovery and genotyping applied to the periwinkle *Littorina saxatilis*. *Journal of*  
734 *Molluscan Studies*, **82**, 104–109.  
735 Li YC, Korol AB, Fahima T, Beiles A, Nevo E (2002) Microsatellites: genomic  
736 distribution, putative functions and mutational mechanisms: a review. *Molecular*  
737 *Ecology*, **11**, 2453–2465.  
738 Lischer HEL, Excoffier L (2012) PGDSpider: an automated data conversion tool for  
739 connecting population genetics and genomics programs. *Bioinformatics*, **28**, 298–  
740 299.  
741 Liu S, Palti Y, Gao G, Rexroad CE (2016) Development and validation of a SNP panel  
742 for parentage assignment in rainbow trout. *Aquaculture*, **452**, 178–182.  
743 Mastretta-Yanes A, Arrigo N, Alvarez N, Jorgensen TH, Piñero D, Emerson BC (2015)  
744 Restriction site-associated DNA sequencing, genotyping error estimation and de  
745 novo assembly optimization for population genetic inference. *Molecular Ecology*  
746 *Resources*, **15**, 28-41.  
747 Morin PA, Luikart G, Wayne RK (2004) SNPs in ecology, evolution and conservation.  
748 *Trends in Ecology & Evolution*, **19**, 208–216.  
749 Myers EM, Zamudio KR (2004) Multiple paternity in an aggregate breeding amphibian:  
750 the effect of reproductive skew on estimates of male reproductive success.  
751 *Molecular Ecology*, **13**, 1951–1963.  
752 Nali RC, Zamudio KR, Prado CPA (2014) Microsatellite markers for Bokermannohyla  
753 species (Anura, Hylidae) from the Brazilian Cerrado and Atlantic Forest domains.  
754 *Amphibia-Reptilia*, **35**, 355–360.  
755 Paris JR, Stevens JR, Catchen JM (2017) Lost in parameter space: a road map for  
756 stacks. *Methods in Ecology and Evolution*. **8**, 1360–1373.  
757 Pemberton JM, Slate J, Bancroft DR, Barrett JA (1995) Nonamplifying alleles at  
758 microsatellite loci: a caution for parentage and population studies. *Molecular*  
759 *Ecology*, **4**, 249–252.  
760 Peterson BK, Weber JN, Kay EH, Fisher HS, Hoekstra HE (2012) Double digest  
761 RADseq: An inexpensive method for de novo SNP discovery and genotyping in

- 762 model and non-model species (L Orlando, Ed.). *PLoS ONE*, **7**, e37135.
- 763 Pew J, Muir PH, Wang J, Frasier TR (2015) related: an R package for analysing pairwise  
764 relatedness from codominant molecular markers. *Molecular Ecology Resources*, **15**,  
765 557–561.
- 766 Primmer CR, N Painter J, T Koskinen M, U Palo J, Merilä J (2005) Factors affecting  
767 avian cross-species microsatellite amplification. *Journal of Avian Biology*, **36**, 348–  
768 360.
- 769 Puritz JB, Matz MV, Toonen RJ *et al.* (2014) Demystifying the RAD fad. *Molecular*  
770 *Ecology*, **23**, 5937–5942.
- 771 Queller DC, Strassmann JE, Hughes CR (1993) Microsatellites and kinship. *Trends in*  
772 *Ecology & Evolution*, **8**, 285–288.
- 773 R Core Team (2016) R: A Language and Environment for Statistical Computing. R  
774 Foundation for Statistical Computing, Vienna, Austria. [http:// www.R-project.org/](http://www.R-project.org/).
- 775 Rohland N, Reich D (2012) Cost-effective, high-throughput DNA sequencing libraries for  
776 multiplexed target capture. *Genome Research*, **22**, 939–946.
- 777 Ross KG (2001) Molecular ecology of social behaviour: analyses of breeding systems  
778 and genetic structure. *Molecular Ecology*, **10**, 265–284.
- 779 Rowley I, Russell EM (1997) *Fairy-wrens and Grasswrens: Maluridae*. Oxford University  
780 Press.
- 781 Saunders IW, Brohede J, Hannan GN (2007) Estimating genotyping error rates from  
782 Mendelian errors in SNP array genotypes and their impact on inference. *Genomics*,  
783 **90**, 291–296.
- 784 Schodde, R (1982). *The fairy-wrens* (ed. Bass T). The Craftsman Press. Victoria,  
785 Australia.
- 786 Seeb JE, Carvalho G, Hauser L *et al.* (2011) Single-nucleotide polymorphism (SNP)  
787 discovery and applications of SNP genotyping in nonmodel organisms. *Molecular*  
788 *Ecology Resources*, **11**, 1–8.
- 789 Selkoe KA, Toonen RJ (2006) Microsatellites for ecologists: a practical guide to using  
790 and evaluating microsatellite markers. *Ecology Letters*, **9**, 615–629.
- 791 Shafer A, Peart CR, Tusso S, Maayan I, Brelsford A, Wheat CW, Wolf JB (2016)  
792 Bioinformatic processing of RAD-seq data dramatically impacts downstream  
793 population genetic inference. *Methods in Ecology and Evolution*, **8**, 907–917.
- 794 Slate J, Gratten J, Beraldi D *et al.* (2010) Gene mapping in the wild with SNPs:  
795 guidelines and future directions. *Genetica*, **136**, 97–107.
- 796 Solomon NG, Keane B, Knoch LR (2004) Multiple paternity in socially monogamous  
797 prairie voles (*Microtus ochrogaster*). *Canadian Journal of Zoology*, **82**, 1667–1671.
- 798 Strucken EM, Lee SH, Lee HK *et al.* (2016) How many markers are enough? Factors  
799 influencing parentage testing in different livestock populations. *Journal of Animal*  
800 *Breeding and Genetics*, **133**, 13–23.
- 801 Syvänen A-C (2001) Accessing genetic variation: genotyping single nucleotide  
802 polymorphisms. *Nature Reviews Genetics*, **2**, 930–942.
- 803 Tokarska M, Marshall T, Kowalczyk R *et al.* (2009) Effectiveness of microsatellite and  
804 SNP markers for parentage and identity analysis in species with low genetic



805 diversity: the case of European bison. *Heredity*, **103**, 326–332.

806 Tortereau F, Moreno CR, Tosser-Klopp G, Servin B, Raoul J (2017) Development of a  
807 SNP panel dedicated to parentage assignment in French sheep populations. *BMC*  
808 *Genetics*, **18**, 50.

809 Wang J (2002) An estimator for pairwise relatedness using molecular markers. *Genetics*,  
810 **160**, 1203–1215.

811 Wang J (2007) Triadic IBD coefficients and applications to estimating pairwise  
812 relatedness. *Genetical Research*, **89**, 135–153.

813 Webster MS, Reichart L (2005) Use of microsatellites for parentage and kinship  
814 analyses in animals. *Methods in Enzymology*, **395**, 222–238.

815 Weinman LR, Solomon JW, Rubenstein DR (2015) A comparison of single nucleotide  
816 polymorphism and microsatellite markers for analysis of parentage and kinship in a  
817 cooperatively breeding bird. *Molecular Ecology Resources*, **15**, 502–511.

818 Westneat DF, Sherman PW, Morton ML (1990) The ecology and evolution of extra-pair  
819 copulations in birds. *Current Ornithology*, **7**, 331–370.

820 White PS, Densmore LD (1992) Mitochondrial DNA isolation. In: *Molecular Genetic*  
821 *Analysis of Populations: A Practical Approach* (ed. Hoelzel AR), pp. 50–51. Oxford  
822 University Press, New York, NY.

823 Willing E-M, Hoffmann M, Klein JD, Weigel D, Dreyer C (2011) Paired-end RAD-seq for  
824 de novo assembly and marker design without available reference. *Bioinformatics*,  
825 **27**, 2187–2193.

826

827

828

829

830

831

832

833

834

835

836

837

838

839

840

841

842

843

844

845

846

847

848 **Data Accessibility**

849 The raw data used in this manuscript will be stored in the Dryad Digital Repository upon  
850 acceptance.

851  
852 **Author Contributions**  
853 D.J.T designed the study, collected field data, performed microsatellite development and  
854 analysis, conducted parentage and relatedness analyses, and drafted the manuscript  
855 with help from all co-authors. B.G.B and L.C. designed the study, and performed SNP  
856 discovery and analysis. M.S.W and I.J.L. helped design the study, and secured funding.

857  
858  
859  
860  
861  
862  
863  
864  
865  
866  
867  
868  
869  
870  
871  
872  
873  
874  
875  
876  
877  
878  
879  
880  
881  
882  
883  
884  
885  
886  
887  
888  
889  
890

891 **Tables**

892  
 893 Table 1: Experimental design. Index groups 9-12 were included in our sequencing run to  
 894 assess how changes in our molecular protocol impacted the number of loci recovered.  
 895 Therefore, we selected the same 20 individuals for these four index groups to reduce the  
 896 possible sources of variation.  
 897

| Number of samples (index groups)        | Enzymes      | Size selection interval             | Group |
|-----------------------------------------|--------------|-------------------------------------|-------|
| 160 samples (8 index groups, index 1-8) | Sbfl - MspI  | 450 - 600 bp                        | All   |
| 20 samples (Index 1)                    | Sbfl - MspI  | 450 - 600 bp (replicate of above)   | A     |
| 20 samples (Index 9)                    | Sbfl - MspI  | 450 - 600 bp (replicate of above)   | B     |
| 20 samples (index 10)                   | Sbfl - MspI  | 400 - 700 bp (wide size selection)  | C     |
| 20 samples (index 11)                   | Sbfl - EcoRI | 450 - 600 bp (infrequent 3' cutter) | D     |
| 20 samples (index 12)                   | Sbfl - EcoRI | 450 - 600 bp (replicate of above)   | E     |

898  
 899  
 900 Table 2. Overlap in the RAD loci that were obtained while varying different steps of the  
 901 protocol (size selection and restriction enzymes). The diagonal indicates the total  
 902 number of loci recovered for each treatment. Values above the diagonal represent the  
 903 percent overlapping loci between groups (relative to the group with the smallest number  
 904 of loci), while values below the diagonal list the number of loci that were overlapping  
 905 between groups.  
 906

|     | All | A    | B    | C    | D   | E    |
|-----|-----|------|------|------|-----|------|
| All | 411 | 85.4 | 78.1 | 79.1 | 1.2 | 1.0  |
| A   | 351 | 797  | 85.1 | 75.8 | 0.8 | 0.8  |
| B   | 321 | 549  | 645  | 83.4 | 2.0 | 2.3  |
| C   | 325 | 604  | 538  | 1440 | 4.2 | 3.9  |
| D   | 5   | 15   | 12   | 25   | 596 | 68.4 |
| E   | 4   | 13   | 12   | 20   | 353 | 516  |

907  
 All: 160 samples; Sbf1/Msp1; 450-600 bp.  
 A: 20 samples; Sbf1/Msp1; 450-600 bp (Index 1).  
 B: 20 samples; Sbf1/Msp1; 450-600 bp (Index 9).  
 C: 20 samples; Sbf1/Msp1; 400-700 bp (Index 10).  
 D: 20 samples; Sbf1/EcoRI; 450-600 bp (Index 11).  
 E: 20 samples; Sbf1/EcoRI; 450-600 bp (Index 12).

908

909 Table 3. Overlap in filtered RAD loci and those present in the catalogs from the  
 910 different assemblies. The filtered loci from the groups in the different rows were aligned  
 911 against databases generated from the catalogs of the groups in the columns. The  
 912 numbers in the table are the percent of filtered loci from each group that match loci that  
 913 are in the catalog of the target database. The diagonal contains the total number of loci  
 914 recovered for each group and the total number of loci in each catalog are 49662 (All),  
 915 27085 (A), 25521 (B), 29554 (C), 11823 (D), 16724 (E).  
 916

|     | All  | A    | B    | C    | D    | E    |
|-----|------|------|------|------|------|------|
| All | 411  | 99.5 | 99.3 | 99.0 | 5.6  | 9.2  |
| A   | 99.2 | 797  | 99.1 | 99.1 | 7.9  | 11.9 |
| B   | 99.2 | 99.1 | 645  | 99.1 | 7.9  | 12.6 |
| C   | 98.5 | 88.7 | 89.8 | 1440 | 7.4  | 11.4 |
| D   | 37.1 | 22.8 | 21.8 | 22.5 | 596  | 99.7 |
| E   | 42.8 | 21.3 | 19.0 | 20.2 | 96.3 | 516  |

917  
 918  
 919  
 920  
 921

Table 4. Marker characteristics. He: Expected heterozygosity; Ho: Observed heterozygosity; PIC: Polymorphic information content.

| Marker Panel    | Number of loci | Mean proportion loci typed | Mean alleles per locus | Mean H <sub>e</sub> | Mean H <sub>o</sub> | Mean PIC | Nonexclusion probability (first parent) | Nonexclusion probability (second parent) | Nonexclusion probability (parent pair) |
|-----------------|----------------|----------------------------|------------------------|---------------------|---------------------|----------|-----------------------------------------|------------------------------------------|----------------------------------------|
| Microsatellites | 12             | 0.99                       | 14.17                  | 0.77                | 0.76                | 0.74     | $1.9 \times 10^{-4}$                    | $1.9 \times 10^{-6}$                     | $1.5 \times 10^{-10}$                  |
| SNPs            | 411            | 0.98                       | 2.00*                  | 0.45                | 0.45                | 0.35     | $5.2 \times 10^{-20}$                   | $6.9 \times 10^{-35}$                    | $1.0 \times 10^{-55}$                  |

\*Only biallelic SNPs were retained. If a locus had 3 alleles across the population, it was filtered from the dataset.

922  
 923  
 924  
 925  
 926  
 927  
 928  
 929

Table 5: Summary information for ddRAD-seq studies performed to investigate parentage in other bird species. Only SNPs with up to 5% missing data, with a minimum coverage of 10x and a minor allele frequency of 0.25 were retained. HWE: Hardy-Weinberg equilibrium.

| Species                      | Scientific name               | Number of individuals | Number of loci | Number of loci in HWE |
|------------------------------|-------------------------------|-----------------------|----------------|-----------------------|
| Variegated fairy-wren*       | <i>Malurus lamberti</i>       | 373                   | 234            | 157                   |
| Hispaniolan woodpecker**     | <i>Melanerpes striatus</i>    | 288                   | 179            | 135                   |
| Northern Red-billed hornbill | <i>Tockus erythrorhynchus</i> | 40                    | 475            | 414                   |
| Von der Decken's hornbill    | <i>Tockus deckeni</i>         | 112                   | 490            | 410                   |
| Sapayoa                      | <i>Sapayoa aenigma</i>        | 6                     | 672            | 671                   |
| Red-backed fairy-wren***     | <i>Malurus melanocephalus</i> | 480                   | 329            | 167                   |

930

931 \* Two independent ddRAD-seq experiments were performed – one with 160 samples  
932 (those from the current study) and a second with 213 samples. After filtering and  
933 demultiplexing, the data from 373 samples were combined for denovo assembly and  
934 SNP identification.  
935 \*\* Samples were run in two experiments and combined, one with 240 samples and the  
936 other with 48.  
937 \*\*\* Two independent ddRAD-seq experiments were run on each set of 240 samples.  
938  
939  
940  
941  
942  
943  
944  
945  
946  
947  
948  
949  
950  
951  
952  
953  
954  
955  
956  
957  
958  
959  
960  
961  
962  
963  
964  
965  
966  
967  
968  
969  
970  
971  
972  
973

974 **Figures**

975 Figure 1. Resolved paternity assignments for 5 nestlings with ambiguous assignments  
976 under the microsatellite panel, but not with the SNP panel. Each panel in the graph  
977 represents an individual offspring, and the two top-ranked males are depicted as a  
978 triangle and a circle, respectively. Lines connecting like shapes show the change in LOD  
979 score for each male, using each marker type (microsatellites versus SNPs). Note that  
980 the y-axis scale varies among panels in the graph.

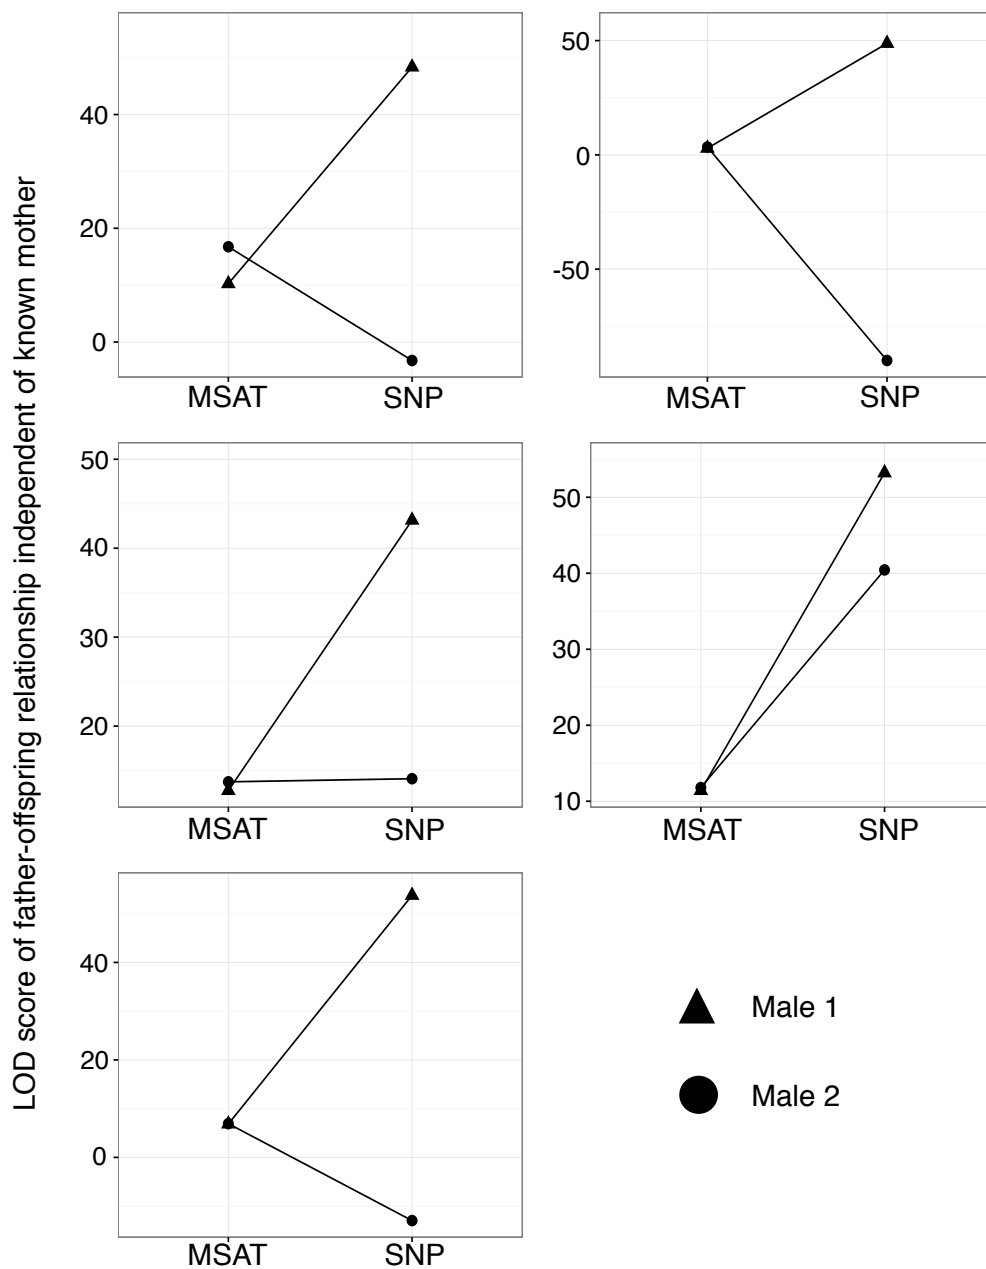

982 Figure 2. Difference in CERVUS LOD scores (delta LOD) between the most likely father  
983 of a nestling and the second possible father in the population, for both marker panels.

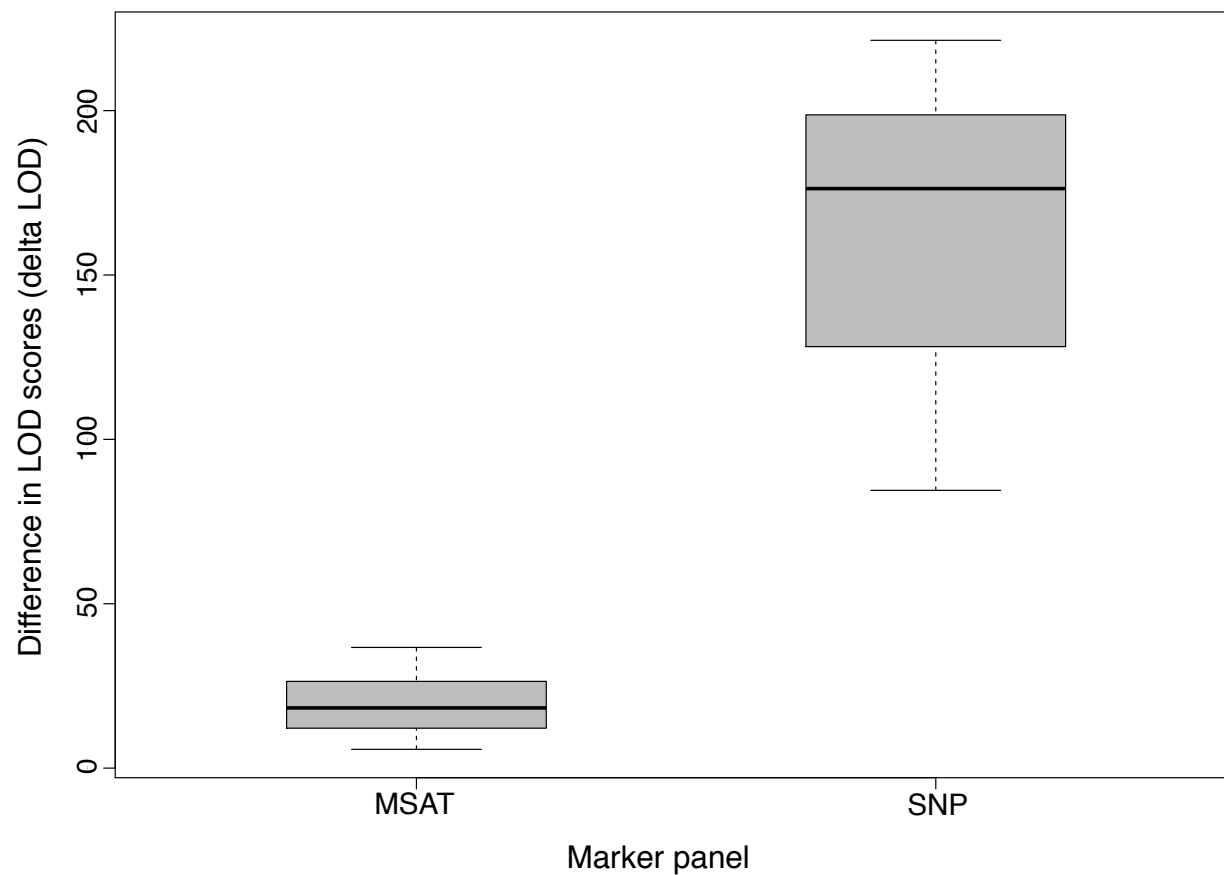

984  
985  
986  
987  
988  
989  
990  
991  
992  
993  
994  
995  
996  
997  
998  
999  
1000

1001 Figure 3. Box plot of pairwise relatedness values for all parent-offspring (40 mother-  
1002 offspring and 40 father-offspring) relationships, using population allele frequencies from  
1003 each marker panel.  
1004

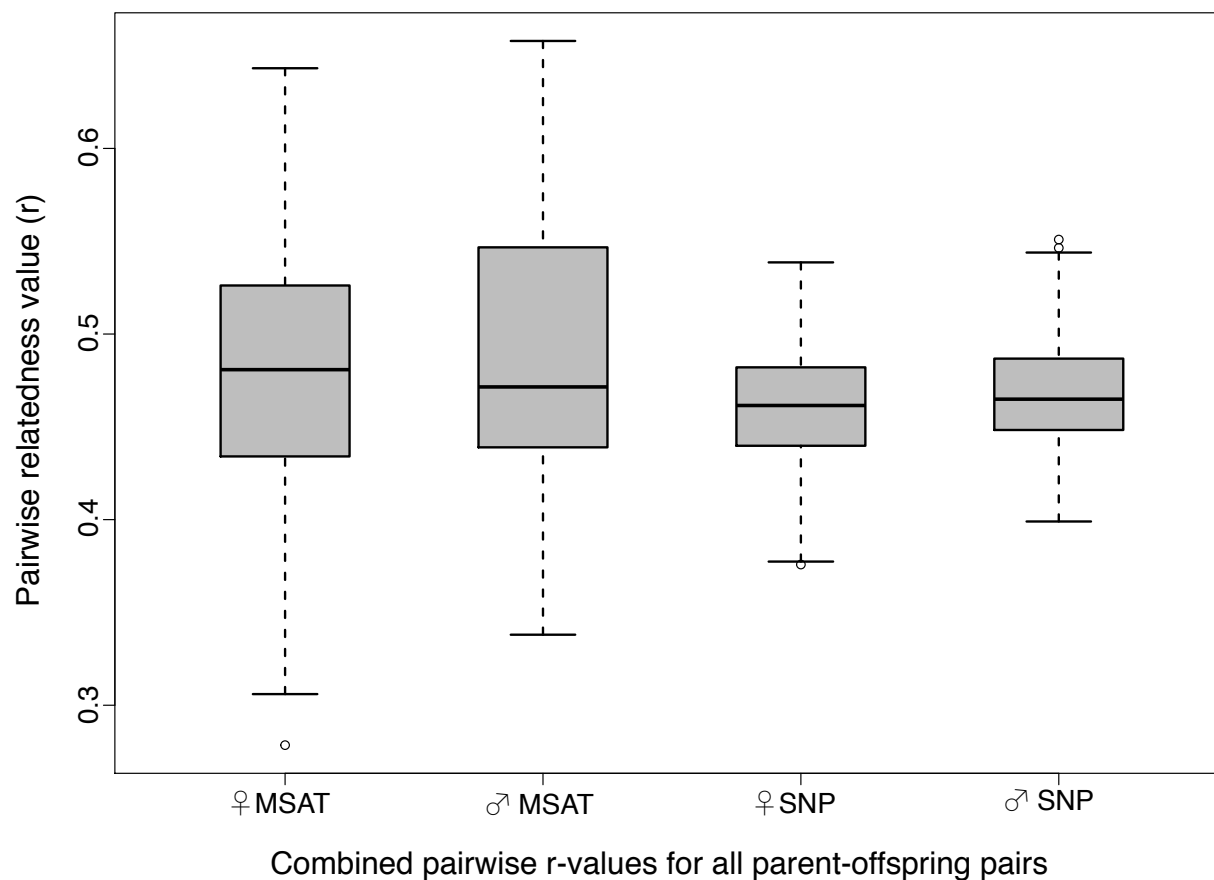

1005  
1006  
1007  
1008  
1009  
1010  
1011  
1012  
1013  
1014  
1015  
1016  
1017  
1018  
1019



1020 Figure 4. Density plots of relatedness values for simulated pairs of known relatedness  
1021 (unrelated, half-sibling, full-sibling, and parent-offspring) using population allele  
1022 frequencies from each marker panel (a. MSAT; b. SNP). Overlap in distributions  
1023 indicates the overlap between relatedness value estimators for pairs of individuals of  
1024 different relationships. The spread of each distribution indicates the reliability of  
1025 observed relatedness values based on their deviation from expected relatedness values  
1026 (Unrelated = 0, Half-sib = 0.25, Full-sib = 0.5, and Parent-offspring (P-O) = 0.5, denoted  
1027 by vertical dashed lines).  
1028

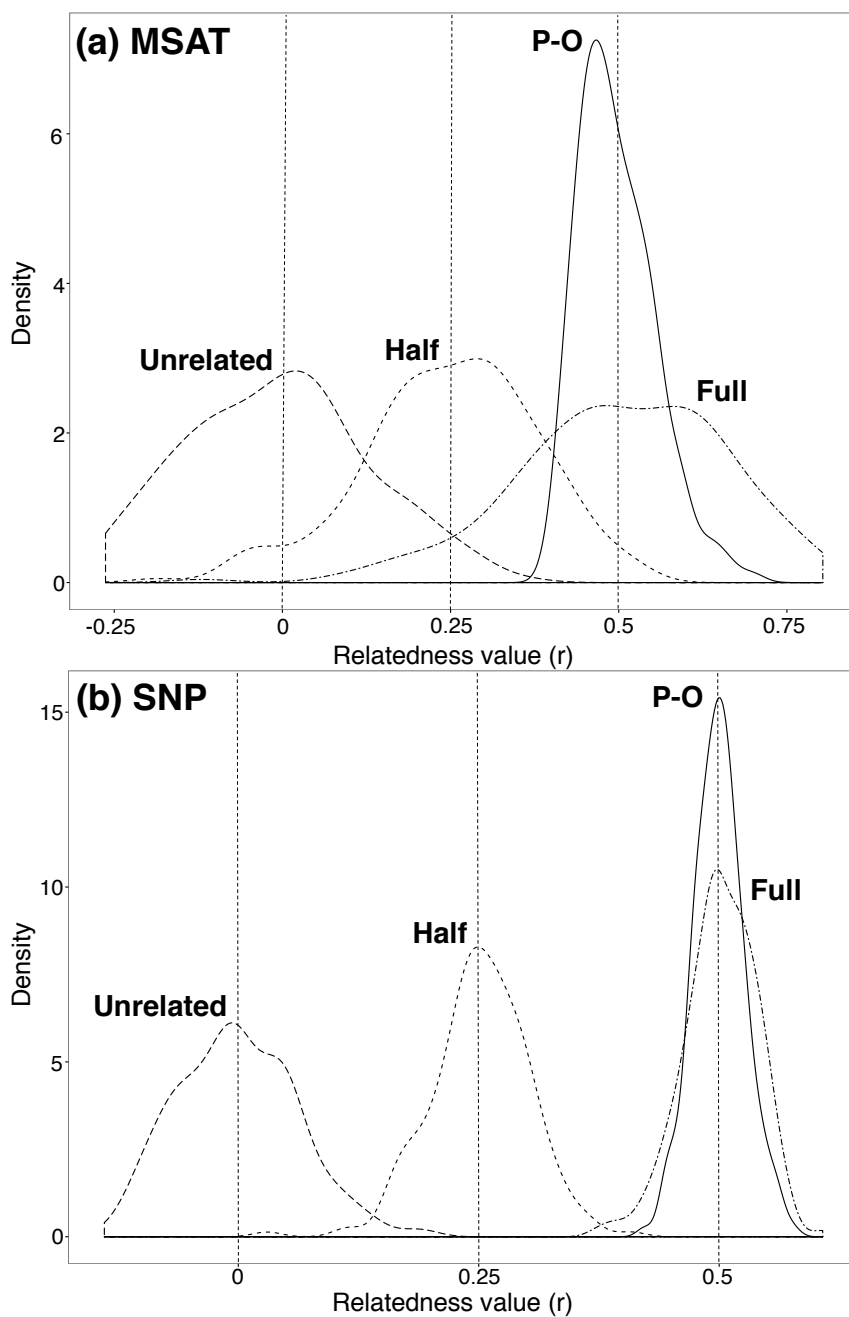

1029
